# Supplementary material
Source: PubMed Central journal article supplement (PMC3313460)
Supplement: NIHMS350794-supplement-4.pdf [file NIHMS350794-supplement-4.pdf]

## LICENCE TO PUBLISH

nature publishing group 

Manuscript #: 2011-07-09809C [ Nature ] ("the Journal")

Title of the contribution: Goblet cells deliver luminal antigen to CD103<sup>+</sup> DC's  
("the Contribution")Author(s): McDole, Whodor, McDonald, Wang, Konjates, Koop, Newberry, Miller  
("the Authors")**To: Nature Publishing Group, a division of Macmillan Publishers Ltd ("NPG")**

1. In consideration of NPG agreeing to publish the Contribution the Authors grant to NPG for the full term of copyright in the Contribution and any extensions thereto, subject to clause 2 and 3 below, the exclusive licence (a) to publish, reproduce, distribute, display and store the Contribution in all forms, formats and media whether now known or hereafter developed (including without limitation in print, digital and electronic form) throughout the world, (b) to translate the Contribution into other languages, create adaptations, summaries or extracts of the Contribution or other derivative works based on the Contribution and exercise all of the rights set forth in (a) above in such translations, adaptations, summaries, extracts and derivative works and (c) to license others to do any or all of the above. submitted to a pre-print service such as arXiv or *Nature Precedings* (in accordance with that service's standard licence terms).
2. Ownership of copyright remains with the Authors, and provided that, when reproducing the Contribution or extracts from it, the Authors acknowledge first and reference publication in the Journal, the Authors retain the following non-exclusive rights:
  - a) To reproduce the Contribution in whole or in part in any printed volume (book or thesis) of which they are the author(s).
  - b) They and any academic institution where they work at the time may reproduce the Contribution for the purpose of course teaching.
  - c) To post a copy of the Contribution as accepted for publication after peer review (in Word or Tex format) on the Authors' own web site or institutional repository, or the Authors' funding body's designated archive, six months after publication of the printed or online edition of the Journal, provided that they also give a hyperlink from the Contribution to the Journals web site.
  - d) To reuse figures or tables created by them and contained in the Contribution in other works created by them.
3. In consideration of NPG agreeing to publish the Contribution, the Authors also grant to NPG for the full term of copyright and any extensions thereto the same rights, that have been granted in respect of the Contribution as set out in clause 1 above, in the Supplementary Information but on a non-exclusive basis.
4. NPG acknowledges that an earlier version of and/or work or material contained within the Contribution may have been submitted to a pre-print service such as arXiv or *Nature Precedings* (in accordance with that service's standard licence terms).
5. The Authors warrant and represent that:
  - a) The Authors are the sole authors of and sole owners of the copyright in the Contribution. If the Contribution includes materials of others, the Authors have obtained the permission of the owners of the copyright in all such materials to enable them to grant the rights contained herein. Copies of all such permissions are attached to this licence.
  - b) All of the facts contained in the Contribution are true and accurate.
  - c) The Author who has signed this Agreement below has full right, power and authority to enter into this Agreement on behalf of all of the Authors.
  - d) Nothing in the Contribution is obscene, defamatory, libelous, violates any right of privacy or infringes any intellectual property rights (including without limitation copyright, patent or trademark) or any other human, personal or other rights of any kind of any person or entity or is otherwise unlawful.
  - e) Nothing in the Contribution infringes any duty of confidentiality which any of the Authors may owe to anyone else or violates any contract, express or implied, of any of the Authors, and all of the institutions in which work recorded in the Contribution was carried out have authorised publication of the Contribution.
6. The Authors authorise NPG to take such steps as it considers necessary at its own expense in the Authors' name and on their behalf if it believes that a third party is infringing or is likely to infringe copyright in the Contribution including but not limited to taking proceedings.
7. The Authors hereby consent to the inclusion of electronic links from the Contribution to third-party material wherever it may be located.
8. This Agreement shall be governed by and construed in accordance with the laws of England without regard to the principles of conflicts of law. The parties hereto submit to the non-exclusive jurisdiction of the English courts.

Signed for and on behalf of the Authors:

Date:

Please print name:

Address:

MARK J. MILLER

1/12/2012  
Rudraj Newberry

# nature

Dear Author,

Your paper may be eligible for our advance online publication (AOP) programme. In this programme, your paper will be published online on *Nature's* website at [www.nature.com/nature](http://www.nature.com/nature) as soon it is typeset and your proof corrections returned. It will be published in print as soon afterwards as space is available. The two versions of the paper are identical.

Our offer of this service is conditional on your agreement to the following:

- Your text, figures and any supplementary information are **all** included when you send us the final version of your paper for formal acceptance, and are **all in Nature-preferred format** (within length and below maximum sizes) as specified in our format instructions at <http://www.nature.com/nature/authors>.
- The corresponding (or otherwise designated) author undertakes to read and return the proofs **within 48 hours** of their receipt.
- The corresponding author signs and returns the "author licence" form **with** the returned proof, **not later**.
- **No changes** can be made to the paper once the online version is published.

Please sign and return this letter, preferably scanned and uploaded with the final version of your manuscript, or fax letter to +44 207 843 4596 if this is not possible. Please specify below the author responsible for returning proofs if different from the corresponding author.

I agree to the above terms and conditions for AOP publication of my paper in *Nature*:

Name:

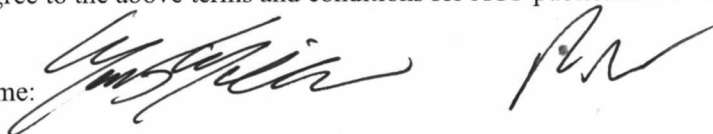

Manuscript number: 2011-07-09809C

Name and contact details (phone, fax and email) of author responsible for returning proofs **if not the corresponding author**:

## MANUSCRIPT CHECKLIST

Manuscript number. 2011-07-09809C  
 Author name. McDole et al  
 Article type. Letter

The following checklist is intended to aid the publication of your manuscript. Please read through the list carefully and amend your manuscript as appropriate. To avoid delays in the production process, please complete and return this sheet with the final version of your manuscript.

### Text

Nature will edit text to conform to house style and for clarity and accessibility. Please check the following points when preparing the final version of your manuscript.

#### Letters to Nature

- Title no longer than 90 characters (including spaces)
- First paragraph referenced and no longer than 300 words
- No subheadings in main text
- Methods for print no longer than 300 words
- Online-only Methods provided as part of the main text file?
- No more than 30 references

#### Articles

- Title no longer than 75 characters (including spaces)
- First paragraph unreferenced and no longer than 150 words
- No more than 6 main subheadings of up to 40 characters (including spaces)
- Methods for print no longer than 300 words
- Online-only Methods provided as part of the main text file?
- No more than 50 references

#### All manuscripts (if applicable)

- Abbreviations and symbols defined on first use
- Italic font used for variables, genes and non-English languages; bold font for vectors
- Equations and special characters in Word in 'normal text' or Symbol font (Word Equation Editor avoided where possible)
- Authored in Compatibility Mode if using Word 2007 (i.e., as a Word 97-2003 document; saved as .doc format, NOT .docx)
- Brief title provided for each figure, table and box
- Figure legends no more than 100 words each (300 words each for contributions without methods sections)
- Author contribution statement included (a statement of responsibility that specifies the contribution of every author; see [http://www.nature.com/authors/editorial\\_policies/authorship.html](http://www.nature.com/authors/editorial_policies/authorship.html))
- Declaration and listing of any competing interests included in manuscript in the Author Information section (<http://www.nature.com/nature/authors/policy/competing.html>)
- Database accession numbers included for sequences determined in this paper
- Structure data in Nature standard tables

### For TeX users

Word or rtf formats are preferred, unless there is very extensive use of special characters or equations. Such formats enable on-screen subediting and the preparation of a 'pre-proof', when the editing can be checked before formal proofs are prepared. We have found that this minimizes the chance of errors being inadvertently introduced.

- Word conversion not practicable

### Artwork

Contact our subeditors at [authors@nature.com](mailto:authors@nature.com) for further help and advice on preparing text for publication.

Nature will edit figures to conform to house style and for clear reproduction in print. Standard figure sizes are 89 mm wide (single column) and 183 mm wide (double column); figures can also be a column-and-a-half width where necessary (120–136 mm). Please check the following points when preparing your figures.

#### Electronic figure formats

- Preferred file formats for line (or vector) artwork and graphs are unflattened eps, postscript, pdf and Illustrator (ai) files
- Preferred file formats for photographic images are TIFF and Photoshop (minimum resolution 300 dpi). If you have created images with separate components on different layers, please send us the Photoshop file (.psd) with the layers intact
- For a full list of acceptable electronic formats, see [http://www.nature.com/nature/authors/submissions/final/Final\\_artwork.pdf](http://www.nature.com/nature/authors/submissions/final/Final_artwork.pdf)

#### When preparing and sending figures

- Text in an editable format and in sans serif font (Helvetica, Arial)
- Text and lines clearly visible when figure is sized for page: type size 6–8 point; lines preferably 0.5 point (0.18 mm)
- Colour images in CMYK (not RGB) mode; ensure you are happy with the conversion from RGB to CMYK before submission
- Suggestions for cover artwork submitted if desired
- For reviews/Insight articles, permission obtained for any republished or redrawn illustrations

See [http://www.nature.com/nature/authors/submissions/final/Final\\_artwork.pdf](http://www.nature.com/nature/authors/submissions/final/Final_artwork.pdf) for detailed guidelines. For further help and advice, e-mail our art editors at [art@nature.com](mailto:art@nature.com).

Nature does not edit online-only material. Please check the following points when preparing Supplementary Information:

### Supplementary Information

- Discrete items of the Supplementary Information (for example, figures, tables) referred to at an appropriate point in the main text (print version) of the paper
- Summary diagram/figure included as part of the Supplementary Information (optional)
- Separate text file ('SI Guide') provided with a brief description (file format and content) of each item
- We recommend that all Supplementary Information is supplied as a single PDF file, where possible.

See <http://www.nature.com/nature/authors/submissions/final/supinfo.html> for advice on preparing Supplementary Information.

E-mail [authors@nature.com](mailto:authors@nature.com) if you have additional queries.
